Title:

Neuronal Mechanisms of Strategic Cooperation

Authors

Wei Song Ong<sup>1\*</sup>, Seth Madlon-Kay<sup>1</sup>, Michael L. Platt<sup>1, 2, 3</sup>

Affiliations

1. Department of Neuroscience, Perelman School of Medicine

2. Department of Psychology, School of Arts and Sciences

3. Marketing Department, the Wharton School

University of Pennsylvania

Philadelphia, PA, 19104, USA

Corresponding author\*

Wei Song Ong

University of Pennsylvania

3440 Market Street Suite 440, Philadelphia, PA 19104

[weisong.o@gmail.com](mailto:weisong.o@gmail.com)

2 Summary (150w):

4 Here we demonstrate that during strategic gameplay monkeys behave as if they reason  
6 recursively about other individuals' beliefs and desires in order to predict their choices and to  
8 guide their own actions, especially the decision to cooperate. Neurons in mid superior temporal  
10 sulcus (mSTS), the putative homolog of the human temporo-parietal junction (TPJ), signal  
12 abstract non-perceptual social information, including payoffs, intentions, and outcomes, and  
14 further distinguish between social and nonsocial agents while monkeys play the game. We  
16 demonstrate for the first time that a subpopulation of these neurons selectively signals  
cooperatively obtained rewards. Neurons in the anterior cingulate gyrus (ACCg), an area  
implicated in vicarious reinforcement and empathy, do not distinguish agency and as a  
population carry less information about strategic variables. These findings suggest the capacity  
to mentalize has deep roots in the strategic social behavior of primates, and endorse mSTS as the  
evolutionary wellspring of these functions.

18 Main:

20 Both emotional and cognitive mechanisms shape the decisions people make when they interact  
22 with others<sup>1,2</sup>. Specifically, vicarious feelings of reward or pain experienced by another, often  
24 termed empathy, can provoke prosocial actions<sup>3</sup>. Strategic reasoning about the beliefs, desires,  
26 and goals of another individual, a process referred to as mentalizing or theory of mind, guides the  
28 decision to cooperate with or betray a partner<sup>4,5</sup>. These two processes interact as well;  
30 manipulations that increase empathy enhance cooperation<sup>6</sup>. Two separate but interacting brain  
32 systems appear to support empathy and mentalizing during social decisions<sup>7</sup>. In humans,  
34 empathy and vicarious experience evoke hemodynamic activity in anterior cingulate gyrus  
(ACCg), anterior insula, and amygdala, and neurons in primate ACCg and amygdala signal  
36 vicarious rewards delivered to other monkeys<sup>8,9</sup>. By contrast, thinking about the beliefs, desires,  
or goals of others evokes hemodynamic activity in the dorsomedial prefrontal cortex and  
temporo-parietal junction (TPJ) in humans<sup>7,10-12</sup>. The neuronal mechanisms underlying such  
mentalizing-related brain activity, however, remain poorly understood in part due to the  
difficulty of eliciting recursive social reasoning in primates or other animals in which neuronal  
activity can be studied directly (but see Haroush<sup>13</sup>) as well as the lack of neurophysiological or  
histological evidence for a TPJ homolog in nonhuman primates<sup>14,15</sup>.

To address this gap, we trained monkeys to play a version of the classic “chicken” game from  
behavioral economics<sup>16</sup>. We also recorded spiking activity of 448 neurons in the middle  
superior temporal sulcus (mSTS), a brain area known to encode perceptual social information  
like faces<sup>17,18</sup> and recently proposed as the primate homolog of TPJ based on MRI-based  
functional connectivity<sup>15</sup>. For comparison, we recorded spiking activity of 528 neurons in  
ACCg, an area strongly linked to vicarious reward and empathy<sup>8,19,20</sup>

Our variant of the chicken game allowed players to coordinate in pursuit of a cooperative reward,  
as well as pursue individual rewards at the expense of the other player. The sizes of the  
cooperative and individual payoffs changed on each trial, encouraging animals to dynamically  
switch between competing and cooperating. In each play session, a monkey played against  
either another monkey, a computer, or a computer with a decoy monkey present. In the live and  
decoy conditions, two monkeys faced each other over a screen that was placed horizontally  
between them and parallel to the ground (Figure 1a). They used joysticks to interact with the  
game and eye position was recorded at 1000 Hz (Eyelink). Two colored rings framing moving  
dots (hereafter ‘cars’) and 6 arrays of tokens were presented on the screen. Token arrays  
indicated the amount of juice reward available for going straight or deviating alone for each  
player. If one player went straight and the other deviated, each would receive juice proportional  
to the tokens acquired. If both players went straight, the cars “crashed” into each other, and no  
reward was delivered. If both monkeys chose to deviate they received the associated rewards  
plus bonus tokens released by pushing the cooperation bar (Figure 1c & 1f). Payoffs varied  
randomly from trial to trial. The white dots within the car flowed in the direction in which the  
joystick was currently held, providing an intention cue to the opponent that could either be clear  
(100% correlated dots) or ambiguous (0% correlated dots). When a player held the joystick in  
one direction for 0.5 secs, the dots changed color and the player’s choice was locked (see  
supplementary task video).

64 Overall, monkeys made choices that aligned with the mixed strategy Nash equilibrium prediction  
65 based on available payoffs (Figure 2c) when the opponent's intentions were clearly signaled by  
66 the moving dots in the cars. When intentions were ambiguous, only 69% of trial outcomes  
67 followed the mixed strategy Nash equilibrium (figure 2d). The fact that monkeys largely avoided  
68 crashing even in the absence of explicit intention signals suggests they relied on other  
69 information to guide their choices. We explored the possibility that monkeys used visual cues  
70 available from the other monkey and also tested the idea that monkeys formed a model of their  
opponent to guide their choices.

72 After a brief fixation period to start each trial, gaze was unconstrained. Monkeys spent most of  
73 the token onset period (500ms) looking at the tokens in front and to the side of the screen  
74 regardless of agency condition (supplementary figure 1a & b). Monkeys spent at least 1/3 of the  
75 first 500ms of the choice period looking at the opponent's car (Figure 2ei, top panel). However,  
76 monkeys spent less time looking at the opponent's car in the live condition than either the decoy  
77 or computer condition. This difference was offset by spending more time looking at the face of a  
78 live opponent, although monkeys also spent more time looking at a decoy's face toward the end  
79 of the choice period. Thus, monkeys looked at key sources of information during the trial and  
80 their gaze distinguished agency conditions that were perceptually similar (decoy vs. live). Gaze  
81 also reflected whether intentions were signaled within the cars. Monkeys preferentially looked at  
82 the opponent's car when signal strength was high compared with when it was low (Figure 2ei,  
83 lower panel). During reward delivery, monkeys were much more likely to look at a live opponent  
84 drinking earned juice than towards a decoy, and were more likely to look at any monkey than the  
85 dripping juice tube present in the computer condition (figure 2eiii). Finally, monkeys were much  
86 less likely to look at a monkey with whom he had cooperated to acquire bonus reward  
87 (supplementary figure 1c). Thus, monkeys adaptively sampled visual information about payoffs,  
88 the intentions of the opponent, and perceptual social cues, and this process betrayed a sense of  
the agency of the opponent.

90 These data invite the hypothesis that monkeys sampled multiple sources of information to  
91 compute and update a model of the opponent, which they used to guide their own choices. We  
92 explored this hypothesis by comparing their behavior to a series of decision models of increasing  
93 cognitive sophistication. Each model assumes that monkeys calculated the expected value of  
94 each option based on a prediction of his opponent's actions. If his opponent was likely to go  
95 straight, he should yield to secure the small but safe reward instead of risking a crash. In the least  
96 sophisticated model, the monkey believes his opponent chooses with some fixed probability that  
97 is not influenced by the payoffs. In the more sophisticated models, the monkeys either realize  
98 their opponents also try to maximize their own payoffs and accordingly choose differently when  
99 payoffs are different, learn adaptively about their opponent's strategies based on experience, or  
100 both. The learning models update beliefs about the opponent's strategies using a strategic  
101 prediction error (SPE), the difference between the opponent's predicted strategy and his actual  
102 choice. The best-fitting model was the most sophisticated, including both representation of the  
103 opponent's utility and SPE-driven learning (mean decrease in AIC = 774)<sup>21</sup> (Figure 3b). For  
104 comparison, players' behaviors did not follow tit-for-tat<sup>22</sup> or win-stay-lose-shift<sup>23</sup> strategies  
(supplementary figure 2b), and we found no evidence for simple reinforcement-learning.

106 Our modeling exercise suggests monkeys behave as if they reason recursively about other  
108 individuals' beliefs, motivations, and strategy in order to predict their choices and to guide their  
110 own actions. The depth of this recursion depended on monkey identity (figure 3D). When  
112 intentionality was assigned to the opponent within the model, improvement in fit was greater for  
114 subordinate monkeys than for dominant monkeys. These findings suggest subordinate monkeys  
were more sensitive to the intentions of dominant monkeys in the game, consistent with prior  
reports that subordinate monkeys pay more attention to dominant monkeys, who themselves  
attend selectively to other dominant monkeys<sup>24,25</sup>. Furthermore, the same mid-ranking monkey  
played against different opponents (brown and purple in figure 3d), and their strategies were  
more consistent with relative dominance than individual identity.

116 Our behavioral and eye-tracking data demonstrate monkeys are exquisitely sensitive to payoffs  
118 for self and their opponent, information about intentions, and reward outcomes, as well social  
120 information reflecting identity, social dominance, and perhaps gaze direction. Monkeys use this  
information to compute a model of their opponent, including how likely he is to behave  
cooperatively.

We next queried the role of neurons in ACCg, a brain area associated with vicarious  
122 reinforcement and empathy, and mSTS, a brain area linked to perceptual social processes and  
124 recently proposed as the primate homolog of human TPJ, in the computational processes  
underlying behavior in our task. We found that firing rates of neurons in both areas were  
126 sensitive to payoffs early in the trial, the presence of intention signals within the cars, and the  
amount of reward received after both monkeys made their choices. The strength and abundance  
of these signals varied between brain areas, across agency conditions, and as a function of time  
128 during each trial (Figures 4c, Supplementary Figure 3b).

We used linear models (LMs) to quantify neuronal sensitivity to payoffs, intention signals,  
130 reward outcomes, cooperation, and gaze towards the opponent's face. Across the population, we  
found that 33% of mSTS neurons distinguished between payoff conditions during the period  
132 when the tokens were presented (0-500ms from token onset), but only 14% of ACCg neurons did  
so (supplementary figure 3A). A small proportion of neurons in both areas encoded SPE  
134 estimated from the previous trial (10% in mSTS, 8% in ACCg).

We next focused analysis on the reward delivery epoch. Figure 4A shows an example mSTS  
136 neuron from a monkey playing a live opponent. This neuron fired more strongly for rewards  
received through cooperation than for equivalent rewards received for selfish actions (Figure  
138 4ai). By contrast this neuron was much less sensitive to the amount of reward received (Figure  
4aaii). This neuron also fired strongly when the monkey predicted that the opponent had a low  
140 versus high probability of swerving on that trial (Pt). (Figure 4aiii). We next asked whether  
mSTS neuron responses to cooperative reward might instead reflect perceptual social signals  
142 associated with looking at the opponent's face. Overall, players tended not to look at their  
opponent's face-space after cooperating, even after controlling for reward size ( $p < 1 \times 10^{-40}$ ).  
144 When we scrutinized only those trials on which the monkey did not look at his opponent's face,  
this neuron still fired more strongly for cooperative rewards than selfish rewards (figure 4aiv).

146 We found similar neurons in ACCg when the monkey played a live opponent. An example  
neuron (Figure 4b) decreased its firing rate immediately after juice delivery for cooperation, but

148 increased firing for non-cooperative juice rewards (Figure 4bi). This neuron also increased firing  
150 rate for ‘chicken’ rewards (Figure 4bii) but did not signal the monkey’s predictions of his  
152 opponent’s strategies (Figure 4biii). For those trials on which the monkey did not look at his  
opponent’s face, this neuron still differentiated cooperative and non-cooperative rewards (Figure  
4biv).

154 Firing rates of between 29% and 47% of neurons in both brain areas were significantly  
156 modulated by the amount of realized reward in all three agency conditions during reward  
158 delivery (250-1250ms post juice delivery, between agency  $F=4.92$ ,  $p=0.007$ ), while 20-24% of  
160 them were similarly modulated in the post-decision period preceding juice delivery (Figure 4c).  
Remarkably, firing rates of 38% of mSTS neurons were modulated by cooperation, compared to  
only 20% in ACCg (2-way ANOVA,  $F=40.24$ ,  $p<10^{-7}$ ) in the reward delivery period. Roughly  
20% of neurons in both areas carried information about the opponent’s predicted strategy (Figure  
4c). Activity of only a small percentage of neurons was modulated by gaze at the opponent (7-  
11% in ACC, 10-16% in mSTS).

162 We next explored in depth neurons that were selective for cooperation. We found that some of  
164 these neurons were excited by cooperation while others were suppressed (from figure 5a & 6a,  
166 categorized by the sign of the LM regression coefficient). When analyzed separately,  
168 subpopulations in mSTS distinguished the mechanism—cooperation or selfish choice—by which  
170 the same amount of juice was obtained (Figure 5a); the control trials where only one player  
172 played and could not crash, which had been held out from the LM analysis, showed distinct  
174 responses compared to the cooperative outcome but not the selfish outcome (yellow line, figure  
176 5a & 6a). Similarly identified subpopulations in ACCg lacked these distinctive patterns of  
178 activation or inhibition in response to cooperation (figures 5b & 6b). Like neurons in mSTS,  
180 firing rates of ACCg neurons distinguished amount of juice received (Figure 4c), but showed no  
consistent differences between cooperative, selfish, chicken and control rewards (Figure 5b).  
Most importantly, population responses to cooperative rewards were no different than those for  
chicken outcomes, which were achieved by the same joystick movement. By contrast, mSTS  
neurons discriminated cooperative rewards from all others (selfish, chicken, and control; Figure  
5a). This is especially noteworthy considering that joystick movement and subsequent car  
movements were perpendicular for the selfish and chicken outcomes, but cooperative and  
chicken outcomes were achieved by the same joystick movement and car translation. These  
findings strongly endorse the conclusion that mSTS cooperation signals are not mere reflections  
of sensory or motor task contingencies.

182 We focused the cooperative reward analyses on the epoch 250-1250ms after reward. Excitation  
184 and suppression by cooperation, however, varied over time. Early (250-750ms post-reward), 20-  
23% of mSTS neurons signaled cooperation by increasing firing rate, while 7-15% did so by  
186 decreasing firing rate. Later (750-1250ms post-reward), 25-29% of neurons decreased firing rate  
188 for cooperation while 7-15% of neurons increased firing rate (Supplementary Figure 4b).  
Overall, we found that 50-60% of mSTS neurons significantly encoded cooperation in one or  
both reward epochs (36-45% for a single epoch, 15-16% for both epochs), compared to a much  
smaller percentage of ACCg neurons (16-20% in a single epoch, 5-6% in both epochs;  
Supplementary Figure 4).



190 Discussion:

192 The evolutionary, economic, and biological origins of human cooperation remain hotly debated  
26–28. Both empathy and strategic reasoning contribute to cooperation in humans<sup>29</sup>, supported by  
distinct but interacting brain networks. The evolutionary wellspring of human cooperation and  
194 the neuronal mechanisms that support it are not well-understood, in part due to the difficulty of  
eliciting strategic cooperation in animals, in which direct neural recordings can be made<sup>30</sup>. To  
196 remedy this gap, we here show that monkeys understand and navigate a strategic game with  
payoffs that sometimes favor cooperation. Monkeys behaved as if they reasoned recursively  
198 about other individuals' beliefs and desires in order to predict their choices and to guide their  
own actions, especially the decision to cooperate. They did not use simple strategies such as tit-  
200 for-tat<sup>22</sup> or win-stay-lose-shift<sup>23</sup> to play the game (Supplementary Figure 2b), nor could their  
behavior be explained by simple reinforcement learning. Monkeys paid close attention to payoffs  
202 available for both themselves and their opponents as well as intention signals indicating their  
opponent's choice, and readily distinguished the agency of decoy and live players. These  
204 findings suggest monkeys implement a sophisticated model of their opponent in the game, and  
the recursive depth of this model varies with social status. Like humans<sup>31</sup>, low status monkeys  
206 use skill and guile to interact strategically with higher status individuals<sup>32</sup>, who are more likely  
to behave selfishly (Supplementary figure 1d).

208  
Brain imaging studies in humans indicate that two interacting systems, one associated with  
210 empathy and social emotions and the other linked to mentalizing and social reasoning, support  
social interactions<sup>1,33,34</sup>. Our findings show that neurons in putative primate homologs in both  
212 these systems, the ACCg and the mSTS, encode abstract information associated with strategic  
game play. Notably, non-perceptual social and strategic signals were stronger and more prevalent  
214 in mSTS than ACCg, and were sensitive to the agency of the opponent. By reverse inference<sup>35</sup>,  
these findings endorse the importance of sophisticated reasoning in strategic interactions  
216 between monkeys revealed by our computational model.

218 Prior neurophysiological studies of STS revealed neurons that selectively respond to the sight of  
faces<sup>36,37</sup>, facial expressions<sup>38</sup>, and the direction of social gaze<sup>36,39,40</sup>. We found that roughly  
220 20% of mSTS neurons were sensitive to looking at the face of an opponent, but these signals  
were weak (Figure 4C, D), suggesting either that perceptual social signals are dampened during  
222 strategic interactions or that different populations of mSTS neurons encode perceptual and  
abstract social information. In either case, we provide some of the first neurophysiological  
224 evidence for the representation of abstract, non-perceptual social information in primate mSTS, a  
finding that strongly endorses the hypothesis that this area is the homolog of human TPJ<sup>15</sup>.

226  
Though long thought to be uniquely human, the ability to strategically play mixed-motive games  
228 likely characterizes many social animals<sup>41,42</sup>, particularly primates, that form differentiated  
relationships, including alliances and friendships, in order to navigate the complexities of group  
230 life<sup>43–45</sup>. For long-lived, social primates like rhesus macaques, success depends on the deft  
deployment of cooperation and competition, which leverages individual identification<sup>46</sup>,  
232 memory for previous interactions<sup>47</sup>, investment of biological capital<sup>48</sup>, learning<sup>32,49</sup>, knowledge  
of others' social relationships<sup>44,50</sup>, and sensitivity to the quality of potential allies<sup>47</sup>. Both  
234 prosocial behavior and cooperation in humans also depend on these factors, strongly suggesting  
the underlying mechanisms are conserved across anthropoid primates<sup>43</sup>. Our findings confirm

236 this prediction by demonstrating neurons in the primate social brain network—particularly  
238 mSTS—carry a wealth of non-perceptual strategic information, including payoffs, intention cues,  
240 and outcomes, and selectively signal rewards obtained by cooperation. Modulation of these  
242 signals by opponent agency further strengthens the similarity to human TPJ<sup>10,11</sup>. Thus, large  
scale human societies, with all the complexity that attends cooperation and selfishness—whether  
in the boardroom or on the playground—arise from biological mechanisms that appear to have  
evolved early in the primate clade to support strategic social interactions.

244



## Methods:

246

All experimental methods were approved by the Duke University Institutional Animal Care and Use Committee and were conducted in accordance with the Public Health Service *Guide to the Care and Use of Laboratory Animals*.

250

### *Subjects:*

252

All procedures were approved by the Duke University Institutional Animal Care and Use Committee (protocol registry number: A295-14-12), and were conducted in compliance with the Public Health Service's Guide for the Care and Use of Laboratory Animals.

256

Five male rhesus monkeys (8.6-13.2kg, 9-15 YO) were implanted with head-restraint prostheses (Crist) and neurophysiological recording cylinders (Crist) using standard sterile techniques as described previously (one of our papers here). Animals were initially anesthetized with ketamine hydrochloride and maintained with isofluorene (0.5-5% mg/kg). Enrofloxacin or other vet-prescribed broadspectrum antibiotics, and buprenorphine for pain management were administered after surgical procedures. The animals were visually monitored continuously for at least 2 hours after surgery. The post-operative recovery period was 4 weeks, during which the animal was given free access to fluids and no training or testing was carried out. The recording chambers were cleaned at least 3x/week, treated with antibiotics and sealed with sterile caps. During testing, animals were given access to fluids amounting to at least 20mL/kg/day and supplemented with fruit and vegetables. Dominance relationships between pairs of monkeys were determined by controlled confrontation<sup>51</sup>.

270

### *Behavioral task:*

272

Monkeys sat in primate chairs (Crist) facing each other at a distance of 30 inches with a 27 inch LCD screen placed horizontally between them (Figure 1a). Their heads were tilted slightly downward, at an approximate angle of 20°, allowing them to view both their opponent's face and the screen.

276

278

Eye position and pupil diameter for one monkeys was sampled at 1kHz using an infrared eye tracker (SR Research Eyelink) mounted on the primate chair. At the start of each trial, the eyetracker sent timestamps to the experimental software (Matlab), which collated them with timestamps from the neurophysiological recording system (Plexon) and task events (PsychToolBox). The animals manipulated a joystick (60Hz) placed within the primate chair. The front of the primate chair, including the neck plate, was painted black to obscure the shoulders, hands, and joystick of both monkeys. The task was presented on a shared horizontal screen between the two animals. To initiate the task, the monkey whose eye position was being monitored had to fixate a central white dot on a black background (200ms). The fixation point was then extinguished, and two colored annuli (hereafter "cars") appeared, one above and one below the extinguished fixation point. Each monkey controlled the car located closer to him, which was also cued by color (e.g., blue for M1 and red for M2; Figure 1b, Supplementary Figure 1a is an image with the task stimuli to scale). To continue, the joysticks for both animals

282

284

286

288

290

292 had to be in the neutral position. After a variable delay  $\leq 500$ ms, the coordination bar and four  
293 sets of tokens appeared, two for each player cued by color and position. The number of tokens  
294 was proportional to volume of juice available for achieving that option (0.02ml/token). Five  
295 hundred ms later, a moving dot kinematogram appeared within each car. Monkeys committed a  
296 choice by holding their joystick towards a specific token array for 500ms, at which point the  
297 white dots in the kinematogram changed to the player's color (e.g., blue for M1 and red for M2); if  
298 they did not do so within 4 seconds, the last joystick direction was implemented as his choice.  
299 Monkeys were permitted to make multiple joystick movements freely as they deliberated their  
300 choice, which were immediately translated into the direction the dots moved within the car. After  
301 the choice period, the dots disappeared and the cars moved in the chosen direction. Juice rewards  
302 were delivered to the monkeys via a tube controlled by a solenoid valve. If the monkey achieved  
303 the token array straight ahead or the cooperative outcome, the solenoid opened twice, once for  
304 the smaller constant payoff and again for the second set of tokens in the same location.

305 The total number of tokens presented on the screen was always 41 for each player, divided  
306 between two locations, straight ahead and on the side of the screen. At each location, there was a  
307 small constant payoff of 3 tokens; the remaining 35 tokens were divided between the two  
308 locations in multiples of 5. The payoff for both animals was always symmetrical.

309 On 75% of trials, the larger reward was opposite the controlling monkey behind the opponent's  
310 car; smaller rewards were to the side. To obtain the larger reward, M1 must go straight, but if M2  
311 also did so straight their cars collided and neither received reward ('*crash*', Figure 1Fi). If M1  
312 (M2) goes straight, receiving 28 tokens and M2 (M1) yields, receiving 3 tokens or the 'chicken  
313 reward' (Figure 1Fii & iii) . On the remaining 25% of trials, the smaller reward was opposite the  
314 controlling monkey, behind the opponent's car, and the larger rewards was to the side with all  
315 but 3 tokens behind the cooperation bar. To obtain the larger reward on these trials, both  
316 monkeys had to coordinate their movements and drive their cars to push the 'coordination  
317 bar' ('*cooperate*') (Figure 1Fiv, Supplementary Figure 1). If only one monkey moved his car to  
318 the side and encountered the bar, it did not move and the monkey only received the 3 tokens in  
319 front of the bar ('*chicken*' outcome).

320 On half of trials, the coherence of the moving dot kinematogram was randomized to obscure  
321 intention signals indicating the current directions in which the monkeys were holding their  
322 joysticks. Within session controls were trials on which only one monkey's car and tokens were  
323 displayed. On control trials (10% total, randomly interleaved), monkeys should always choose  
324 straight regardless of the payout scheme since that will return at least 8 tokens while turning to  
325 the side will only yield 3 tokens. Control trials were excluded from the behavioral and neural  
326 analyses unless explicitly mentioned.

327 Seven monkeys were trained to play the task by first playing against a computer opponent that  
328 made straight/yield choices randomly. We varied dot motion coherence to ensure that the  
329 monkeys were attending to the projected future motion of the computer opponent's car. Two  
330 animals did not reach criterion and were removed from further studies. The remaining 5  
331 monkeys were deemed to have reached criterion when they were able to successfully avoid  
332 crashes 95% of the time when the intention signals were 100%. These monkeys also had  
333 thresholds, where their probability of crashing was 50%, that ranged between 15-25% dot motion  
334 coherence.

338 coherence. Only two dot motion coherence levels were used in the final experiment: strong, 90%  
340 coherence; and weak, 0% coherence). All trials were randomly interleaved. The monkeys played  
against different opponents on consecutive days.

#### 342 *Opponent agency conditions*

344 ‘*Live Opponent*’: Two monkeys were present in the experimental setup and both of them actively  
played the chicken game against each other (4 pairs, n= 75, 630 trials).

346 ‘*Computer*’: One monkey was placed into the experimental setup opposite an empty primate  
348 chair. Joystick movements and choices from a randomly chosen prior live monkey behavior  
session were played back as an opponent to the current monkey, and any juice rewards obtained  
350 by the computer were delivered to the empty primate chair (4 players, n= 38, 938 trials).

352 ‘*Decoy*’: Two monkeys were present in the experimental setup, but only one of the animals was  
the designated active player. The ‘decoy’ animal sat in the primate chair and drank the juice  
354 rewards delivered, but the joystick movements and choices from a prior live monkey behavior  
session were played back to the active player as the opponent (4 players, n= 49, 691 trials).

356

#### 358 *Electrophysiological recordings*

360 We acquired structural magnetic resonance images (3T, 1-mm slices) of each monkey’s brain.  
We made a mask consisting of a 3mm sphere around a seed at the fundus of the STS (X = 18.75,  
362 Y = -10.00, Z = -2.25) according to the Montreal Neurological Institute (MNI) atlas). This  
location in mid-STS was selected based on research indicating this region exhibits a functional  
364 connectivity profile most similar to the human TPJ (Mars et al., 2013). The mask was then  
converted into the individual monkey’s native-space structural scan to identify our target  
366 recording location (‘mSTS’) using FSL’s FMRI Expert Analysis Tool (FEAT) Version 6.0.0.  
For both mSTS and ACCg (Brodmann areas 24a and 24b), detailed localizations were made  
368 using Osirix (<http://www.osirix-viewer.com>) or Horos (<https://horosproject.org>) data viewer.

370 All single-unit recordings were made using single tungsten microelectrodes (FHC). In each  
recording session, a sterilized single electrode was secured onto the recording chamber (Crist  
372 Instrument) via an X-Y stage (Crist Instrument) and an adapter (Crist Instrument). The dura was  
penetrated using a sterilized guide tube (22 gauge, stainless steel, custom made), and the  
374 electrode was lowered through the guide tube via a hydraulic microdrive (Kopf Instruments).  
Signals were filtered and recorded using a 8-channel recording system (Plexon Inc). In addition  
376 to being guided by stereotaxic coordinates and MRI localization, each day we confirmed the  
recording site by listening to multiunit changes corresponding to gray and white matter  
378 transitions while lowering the electrode. For the STS recordings, we further verified the  
recording site by listening to multiunit activity that was visually responsive to a set of 200  
380 images (consisting of human and non human primate faces, body parts, and objects). The  
neurons selected for recording in mSTS were within 150um of visually responsive cortex.  
382 Beyond that, neurons in both ACCg and mSTS were selected for recording based strictly on

384 location, stability, and quality of isolation. A total of 528 ACCg and 448 mSTS neurons were  
386 recorded in 4 monkeys, in 3 agency conditions. Live opponents: 256 in ACCg, 208 in mSTS);  
decoy opponent (142 in ACCg 151 in mSTS); and no one (130 in ACCg, 89 in mSTS).

### 388 *Analysis of behavioral data*

390 All behavioral data, including joystick movements and eye-tracking data, was collected and  
analyzed with custom code on MATLAB.

392 For analyzing event outcomes over time, trials from all sessions were collated into 5-trial bins for  
394 the same agency condition (blue, live opponent; green, decoy; grey, computer, figure 2A). To  
396 look at the event outcomes over payout conditions (difference in the number of tokens available  
398 straight ahead, Vstr, and cooperate, Vcoop), the trials were sorted into high signal trials where  
players' joystick movements are indicated by moving dots in the cars; and low signal trials in  
which dots moved randomly.

400 For analyzing eye position signals, we drew boxes around the areas of interest (supplementary  
figure 1a) and quantified the instances in which eye position fell into those areas. The face region  
402 of the recipient was determined empirically prior to the experiments and defined as the area  
between the neck plate and the top bar, and the side panels of the primate chair. We used a large  
404 window to capture gaze shifts that were brief in duration and large in magnitude and often  
directed at varying depths (e.g., eyes, mouth). In the empty chair condition, this would be the  
406 space where the opponent's face would have been<sup>52</sup>.

Eye positions were plotted in 1ms bins, and shown on the figures with standard errors of the  
408 mean calculated between behavioral sessions. The trials were also sorted into high and low  
signal trials, and the difference in looking behavior between the conditions indicate a bias.

410 Statistical tests were conducted as two-tailed ANOVAs with multiple comparisons (Tukey's  
412 HSD test) unless otherwise specified. All figures are shown with standard errors of the mean  
unless otherwise noted.

414 The hybrid reinforcement learning-strategic learning model was computed using Stan<sup>53</sup> via the  
416 MATLAB interface. The choice behavior from each pair of opponents and each agency  
condition were fit separately. The model predicts the choices of one animal conditioned on their  
418 opponent's choices, so the data from each monkey pair was fit twice; once with a given monkey  
being the agent whose choices we were predicting and a second time with that same monkey  
420 being the opponent. All model comparisons were performed using the Akaike Information  
Criterion (AIC)<sup>54</sup>. To compare goodness-of-fit across different subsets of the choice data, we use  
422 the log-likelihood per trial (Figure 3B, Supplementary figure 2), as the absolute log-likelihoods  
are strongly influenced by the number of trials in the data set.

### 426 *Model specification and fitting*

#### 428 *a) Hybrid reinforcement learning and strategic learning model*

430 We model each animals' choice behavior using a model that combines a simple reinforcement  
432 learning (RL) system with an expected value model. The RL system takes into account only  
434 which action, straight or yield, the animal has taken and what reward they receive, while the  
436 expected value system prospectively takes into account which potential reward outcomes are  
438 available on each trial (as indicated by the token symbols on the game board), and chooses  
440 according to how likely each outcome is.

436 The probability of the animal yielding on trial  $t$  is determined by the difference in utility between  
438 the yield and straight choices,  $U_t$ , according to the equations

$$440 \quad p(c_t = \text{yield}) = \text{logit}^{-1}(U_t) \\ U_t = \beta_{0,s_t} + \beta_{V,s_t}(\mathbb{E}[V_t^{\text{yield}}] - \mathbb{E}[V_t^{\text{straight}}]) \\ \quad + \beta_{Q,s_t}(Q_t^{\text{yield}} - Q_t^{\text{straight}}) + \beta_{\kappa,s_t}(\kappa_t^{\text{yield}} - \kappa_t^{\text{straight}})$$

442 where  $c_t \in \{\text{yield}, \text{straight}\}$  is the animal's choice on trial  $t$ . The utility difference is a linear  
444 combination of the output of three valuation sources, denoted by the  $Q$ ,  $\kappa$  and  $\mathbb{E}[V_t]$  values  
446 respectively, each weighted by a temperature parameter. We will discuss each of these sources of  
448 valuation in turn. Note that the temperature parameter for each system differs depending on the  
450 signal strength  $s$  used on the trial  $t$ , which can be either high or low, for a total of six temperature  
452 parameters.

450 The  $Q$  values for yield and straight are learned through a simple RL system using reward  
452 prediction error update equations,

$$452 \quad Q_t^c = \begin{cases} Q_{t-1}^c + \alpha(r_{t-1} - Q_{t-1}^c) & \text{for } c = c_{t-1} \\ Q_{t-1}^c & \text{for } c \neq c_{t-1} \end{cases}$$

454 Here the  $Q$  value of the previously chosen choice is incremented according to the learning rate  $\alpha$   
456 towards the reward received. At the beginning of a session both  $Q$  values are initialized to the  
458 value  $Q_0$ , which is fit as a free parameter bounded between zero and the largest possible payoff  
460 on any trial.

460 Second, the  $\kappa$  values capture autocorrelations in the animal's choices, such as a tendency to  
462 either repeat or avoid the action that has been taken recently. Similar to the  $Q$  values, the  $\kappa$   
464 values are updated each trial using a Rescorla-Wagner rule,

$$464 \quad \kappa_t^c = \begin{cases} \kappa_{t-1}^c + \tau(1 - \kappa_{t-1}^c) & \text{for } c = c_{t-1} \\ (1 - \tau)\kappa_{t-1}^c & \text{for } c \neq c_{t-1} \end{cases}$$

466 where the parameter  $\tau \in [0, 1]$  determines how rapidly the influence of past choices decays. Each  
468  $\kappa$  value is initialized to zero at the beginning of a session.

468 Finally, the expected reward values  $\mathbb{E}[V_t^{\text{yield}}]$  and  $\mathbb{E}[V_t^{\text{straight}}]$  are estimated by the animal on each  
470 trial based on the potential reward values indicated on the game screen as well as the animal's

472 beliefs about his opponent's strategy. On each trial the animal will obtain one of four possible  
reward values,  $V_t^{\text{coop}}$  if both the animal and his opponent yield,  $V_t^{\text{straight}}$  if the animal chooses  
474 straight while his opponent yields,  $V^{\text{safe}}$  if the animal swerves while his opponent goes straight,  
or  $V^{\text{crash}}$  if both the animal and their opponent go straight. Note that the safe and crash values do  
476 not change from trial to trial and are fixed at three tokens and zero tokens, respectively.  
Accordingly, the animal calculates the expected values of the actions straight and yield given his  
478 belief regarding how likely his opponent is to yield. This likelihood is denoted by  
 $p'_t = p(c'_t = \text{yield})$  where  $c'_t$  is the opponent's choice on trial  $t$ . The formulae for the expected  
values are given by

$$\begin{aligned} 480 \quad E[V_t^{\text{yield}}] &= p'_t V_t^{\text{coop}} + (1 - p'_t) V^{\text{safe}} \\ 482 \quad E[V_t^{\text{straight}}] &= p'_t V_t^{\text{straight}} + (1 - p'_t) V^{\text{crash}} = p'_t V_t^{\text{straight}} \end{aligned}$$

484 This prompts the question of how the animal obtains his beliefs regarding his opponent's strategy  
-- that is, where does  $p'$  come from? In our model, the animal's representation of his opponent's  
486 strategy takes the form of a logistic regression which maps the characteristics of each trial onto a  
probability of yielding. The animal learns this logistic regression using online-updating as he  
488 observes his opponent's actions. Formally, this is given by

$$490 \quad p'_t = \text{logit}^{-1}(X_t^T \beta'_{t,s_t})$$

492 where  $X_t = [1, V_t^{\text{coop}} - V_t^{\text{straight}}]^T$  is a vector of regressors consisting of an intercept and the  
difference between the cooperative and straight reward values, and  $\beta'_{t,s}$  is a vector of regression  
494 coefficients. Note that the animal's belief regarding his opponent's strategy differs between the  
high and low signal conditions, as  $\beta'_{t,s}$  differs depending on the signal strength  $s$ .

496 The animal updates his beliefs about his opponent's strategy on each trial using stochastic  
498 gradient descent updates given by

$$500 \quad \beta'_{t,s} = \beta'_{t-1,s} + \eta_{s,s_{t-1}} (\mathbf{I}_{\text{yield}}(c'_{t-1}) - p'_t) X_{t-1}$$

502 The logic of this update is very similar to that of reward prediction error (RPE) updating used in  
RL models. In an RL model, the predicted reward value  $Q$  is updated such that it will be closer to  
504 the reward received on the previous trial. Analogously, here the regression coefficients are  
updated such that the prediction of the logistic regression  $p'$  will be closer to the outcome  
506 observed on the previous trial. The size of the step taken towards the previously observed value  
is governed by a learning rate, here denoted  $\eta$ .

508 As in an RL model, the critical quantity for trial-by-trial learning in our strategic learning model  
510 is the error term that captures how predictions differed from the true outcome. Here this error is  
the term  $\mathbf{I}_{\text{yield}}(c'_{t-1}) - p'_t$ , where  $\mathbf{I}_{\text{yield}}(c')$  is the indicator function that returns one if the  
512 opponent's chose yield and zero if they chose straight. We refer to this quantity as the strategic  
prediction error (SPE) in analogy to the RPE of RL systems.

514



516 Intuitively, beliefs about the opponent's strategy on low signal trials may be less affected by  
517 trials from the high signal condition, and vice versa. Therefore, the regression coefficients for the  
518 high and low signal conditions,  $\beta'_{t,\text{high}}$  and  $\beta'_{t,\text{low}}$ , are updated differentially depending on which  
519 signal condition of the previous trial. Specifically, each set of regression coefficients has  
520 different learning rates depending on whether the trial that is being learned from was high or low  
521 signal condition, such that  $\beta'_{t,\text{high}}$  is updated using  $\eta_{\text{high,high}}$  if the previous trial was high signal  
522 condition, and using  $\eta_{\text{high,low}}$  otherwise. The same is true for  $\beta'_{t,\text{low}}$ , for a total of four different  
learning rates.

524 Beliefs about the opponent's strategy at the beginning of a session are determined by the initial  
525 values  $\beta'_{1,s}$ , which are fit as free parameters.

### 526 *b) Submodel comparisons*

528 In order to determine the level of sophistication of each animal's choice behavior, we compare a  
529 number of submodels of the model presented above, as well as the full model. The full model  
530 assumes that the player ascribes intention (or theory of mind) to the opponent and represents his  
531 opponent's strategy in the form of a logistic regression and updates it online via the strategic  
532 prediction error (SPE). Each submodel is equivalent to the full model with a subset of those  
533 features turned off, which we accomplish by fixing certain parameters at zero. We describe the  
534 submodels in order of (approximately) increasing sophistication, and in the same order that the  
535 submodels are shown, from left to right, in the x-axes of figure 3B.

- 538 1. The least sophisticated submodel is a naive RL model in which all  $\beta$  parameters other  
539 than  $\beta_Q$  and  $\beta_K$  are fixed at zero. This model estimates the values of the actions swerve  
540 and straight based only on reward history and does not incorporate the visual information  
541 presented on each trial about the payoffs available.
- 542 2. The next submodel is a logistic regression on the payoffs available on the current trial.  
543 This model does not use RL or SPE and instead chooses based only on the visual  
544 presented about the payoffs on each trial.  $\beta_Q$  all learning rates  $\eta$  are fixed at zero. Also,  
545 the second elements of the parameter vectors  $\beta'_{t,s}$  are fixed at zero, which leads to beliefs  
546 about the opponent's strategy being invariant to payoff condition; i.e. the animal does not  
547 consider that their opponent has their own intentionality and cares about the payoff  
548 condition.
- 549 3. A combined logistic-RL model, equivalent to the second model described above with  $\beta_Q$   
550 not fixed at zero.
- 551 4. An model that incorporates SPE learning, but without representing the opponent's  
552 intentionality. This is equivalent to the full model with the second elements of the  
553 parameter vectors  $\beta'_{t,s}$  fixed at zero.
- 554 5. A 'static' ToM model where the opponent is assumed to have intentionality and cares  
555 about obtaining higher payoffs, but there is no SPE learning and so beliefs about the  
556 opponent's strategy do not adjust over time. This is equivalent to the full model with all  
learning rates  $\eta$  fixed at zero.



558 Using the expected utility calculations, payoffs and opponent's predicted behavior, we were able  
560 to compute and predict players' behavior as well as his prediction of his opponent's behavior  
(Figure 3C, hybrid RL-logit and ToM for an example pair).

562

### *Analysis of electrophysiology data*

564

566 Single-unit activities were isolated using a combination of principle component analysis (PCA),  
the Template Matching algorithm, and hand-sorting in Offline Sorter (Plexon Inc). All  
subsequent data analyses were accomplished with custom MATLAB scripts.. The peristimulus  
568 time histograms (PSTHs) shown are rendered in 1ms steps with Gaussian smoothing of 10ms on  
both sides. For population PSTHs, firing rates were normalized to the pre-fixation firing rate  
570 (200ms time window immediately before the onset of the fixation cue). Using different time  
windows and an alternative normalizing methods of a) normalizing to whole trial firing rates,  
572 and b) z-scoring of firing rates to the whole trial did not significantly change any main results  
reported. Statistical tests were conducted as two-tailed ANOVAs with multiple comparisons  
574 (Tukey's HSD test) unless otherwise specified.

576 Epoch-based analysis were conducted for 3 distinct time windows: payoff presentation (0-500ms  
after the onset of the tokens on the screen), post-decision/cars move (0-500ms after the end of  
578 the 4s decision period and start of car movement), and juice delivery (250-1250ms after the juice  
is delivered).

580

The responses (neuronal firing rate in the epoch of interest as described above) from non-control  
582 trials were fit with linear models (LM). All continuous variables (including neural responses)  
were z-scored by the trials that made up each neuron's data structure. The models were  
584 individually fit to each neuron and the and ANOVAs were used to classify the responses. The  
variables used in each model are as follows: For payoff presentation, the differences between the  
586 straight and cooperative token amount (Vdiff), the predicted strategy of the opponent for the  
current trial (Pt), and the strategy prediction error for the trial immediately prior (SPE1), all of  
588 which are continuous variables. For the post-decision/cars move and juice realization epoch, we  
include categorical variables as follows: cooperate, signal strength (indicating availability of  
590 explicit information about intentions), and gaze (considered '1' if the animal makes a fixation for  
150ms or longer within the defined 'face' boundaries of his opponent during the 1.5s window  
592 from juice delivery), and the continuous variable reward amount, which is the number of tokens  
the player received in juice. The opponent's predicted strategy (Pt), a continuous variable, is  
594 orthogonalized against 'cooperate' and signal strength to avoid collinearity of the model, and is  
shown on its own as well as an interaction term with cooperate.

596 The terms used to categorized outcomes in figures 5 and 6 are '*cooperate*', where both players  
moved pushed the cooperation bar and received the Vcoop payout; '*selfish*', where one player  
598 goes straight (the *selfish* player), and the other deviated ('*chicken*'); and the controls, where only  
one player's avatar was present.

600

602 Data availability

604 The data that support the findings of this study are available from the corresponding author upon reasonable request.

Code availability

606 The custom analysis code for this study are available from the corresponding author upon reasonable request.

608

## References

- 610
1. Ruff, C. C. & Fehr, E. The neurobiology of rewards and values in social decision making. *Nat. Rev. Neurosci.* **15**, 549–562 (2014).
  - 612 2. Schwarz, N. Emotion, cognition, and decision making. *Cogn. Emot.* **14**, 433–440 (2000).
  - 614 3. Decety, J., Bartal, I. B.-A., Uzefovsky, F. & Knafo-Noam, A. Empathy as a driver of prosocial behaviour: highly conserved neurobehavioural mechanisms across species. *Philos. Trans. R. Soc. Lond. B. Biol. Sci.* **371**, 20150077 (2016).
  - 616 4. Ridinger, G. & McBride, M. *Theory of Mind Ability and Cooperation in the Prisoners Dilemma*. (2016).
  - 618 5. Tomlin, D. *et al.* Agent-specific responses in the cingulate cortex during economic exchanges. *Science* **312**, 1047–50 (2006).
  - 620 6. Batson, C. D. & Moran, T. Empathy-induced altruism in a prisoner’s dilemma. *Eur. J. Soc. Psychol.* **29**, 909–924 (1999).
  - 622 7. Saxe, R. & Kanwisher, N. People thinking about thinking people: The role of the temporoparietal junction in “theory of mind”. *Neuroimage* **19**, 1835–1842 (2003).
  - 624 8. Chang, S. W. C., Gariépy, J.-F., Platt, M. L., Gariépy, J.-F. & Platt, M. L. Neuronal reference frames for social decisions in primate frontal cortex. *Nat. Neurosci.* **16**, (2013).
  - 626 9. Chang, S. W. C. *et al.* Neural mechanisms of social decision-making in the primate amygdala. *Proc. Natl. Acad. Sci.* **112**, 16012–7 (2015).
  - 628 10. Carter, R. M., Bowling, D. L., Reeck, C. & Huettel, S. A. A distinct role of the temporal-parietal junction in predicting socially guided decisions. *Science* **337**, 109–111 (2012).
  - 630 11. Wittmann, M. K. *et al.* Self-Other Mergence in the Frontal Cortex during Cooperation and Competition. *Neuron* **91**, 482–493 (2016).
  - 632 12. Yoshida, W., Seymour, B., Friston, K. J. & Dolan, R. J. Neural Mechanisms of Belief Inference during Cooperative Games. *J. Neurosci.* **30**, 10744–10751 (2010).
  - 634 13. Haroush, K. & Williams, Z. M. Neuronal Prediction of Opponent’s Behavior during Cooperative Social Interchange in Primates. *Cell* (2015). doi:10.1016/j.cell.2015.01.045
  - 636 14. Rushworth, M. F., Mars, R. B. & Sallet, J. Are there specialized circuits for social cognition and are they unique to humans? *Curr. Opin. Neurobiol.* **23**, 436–442 (2013).
  - 638 15. Mars, R. B., Sallet, J., Neubert, F.-X. F.-X. & Rushworth, M. F. S. Connectivity profiles reveal the relationship between brain areas for social cognition in human and monkey temporoparietal cortex. *Proc. Natl. Acad. Sci.* **110**, 10806–10811 (2013).
  - 640 16. Maynard Smith, J. *Evolution and the theory of games*. (Cambridge University Press, 1982).
  - 642 17. Tsao, D. Y., Freiwald, W. a, Knutsen, T. A., Mandeville, J. B. & Tootell, R. B. H. Faces and objects in macaque cerebral cortex. *Nat. Neurosci.* **6**, 989–95 (2003).
  - 644 18. Perrett, D. I., Rolls, E. T. & Caan, W. Visual neurones responsive to faces in the monkey temporal cortex. *Exp. brain Res.* **47**, 329–42 (1982).
  - 646 19. Rudebeck, P. H., Buckley, M. J., Walton, M. E. & Rushworth, M. F. S. A role for the macaque anterior cingulate gyrus in social valuation. *Science* **313**, 1310–2 (2006).
  - 648 20. Singer, T. *et al.* Empathic neural responses are modulated by the perceived fairness of others. *Nature* **439**, 466–9 (2006).
  - 650 21. Camerer, C. & Ho, T. H. Experience-weighted Attraction Learning in Normal Form Games. *Econometrica* **67**, 827–874 (1999).
  - 652 22. Axelrod, R. & Hamilton, W. D. The Evolution of Cooperation. *Science* **211**, 1390–6

- (1981).
- 656 23. Nowak, M. & Sigmund, K. A strategy of win-stay, lose-shift that outperforms tit-for-tat in  
the Prisoner's Dilemma game. *Nature* **363**, (1993).
- 658 24. Shepherd, S. V., Deaner, R. O. & Platt, M. L. Social status gates social attention in  
monkeys. *Curr. Biol.* **16**, R119-20 (2006).
- 660 25. Chance, M. R. A. Attention Structure as the Basis of Primate Rank Orders. *Man* **2**, 503–  
518 (1967).
- 662 26. Tomasello, M., Carpenter, M., Call, J., Behne, T. & Moll, H. Understanding and sharing  
intentions: The origins of cultural cognition. *Behav. Brain Sci.* **28**, 675–691 (2005).
- 664 27. Warneken, F. & Tomasello, M. in *The Oxford Handbook of Prosocial Behavior* (2015).  
doi:10.1093/oxfordhb/9780195399813.013.007
- 666 28. Efferson, C. & Fehr, E. Simple moral code supports cooperation. *Nature* **555**, 169–170  
(2018).
- 668 29. Silk, J. B. & House, B. R. Evolutionary foundations of human prosocial sentiments. *Proc.*  
*Natl. Acad. Sci. U. S. A.* **108 Suppl**, 10910–7 (2011).
- 670 30. Cheney, D. L. Extent and limits of cooperation in animals. *Proc. Natl. Acad. Sci. U. S. A.*  
**108 Suppl**, 10902–9 (2011).
- 672 31. Parkinson, C., Kleinbaum, A. M. & Wheatley, T. Spontaneous neural encoding of social  
network position. *Nat. Hum. Behav.* **1**, 72 (2017).
- 674 32. Drea, C. M. & Wallen, K. Low-status monkeys 'play dumb' when learning in mixed  
social groups. *Proc. Natl. Acad. Sci. U. S. A.* **96**, 12965–9 (1999).
- 676 33. Lee, D. & Seo, H. Neural Basis of Strategic Decision Making. *Trends Neurosci.* **39**, 40–48  
(2016).
- 678 34. Saxe, R. Uniquely human social cognition. *Curr. Opin. Neurobiol.* **16**, 235–239 (2006).
- 680 35. Poldrack, R. A. Inferring mental states from neuroimaging data: From reverse inference to  
large-scale decoding. *Neuron* **72**, 692–697 (2011).
- 682 36. Perrett, D. I. *et al.* Social Signals Analyzed at the Single Cell Level: Someone is Looking  
at Me, Something Moved! *Int. J. Comp. Psychol.* **4**, (1990).
- 684 37. Tsao, D. Y., Freiwald, W. A., Tootell, R. B. H. & Livingstone, M. S. A cortical region  
consisting entirely of face-selective cells. *Science* **311**, 670–4 (2006).
- 686 38. Hasselmo, M. E., Rolls, E. T. & Baylis, G. C. The role of expression and identity in the  
face-selective responses of neurons in the temporal visual cortex of the monkey. *Behav.*  
*Brain Res.* **32**, 203–218 (1989).
- 688 39. Roy, A., Shepherd, S. V & Platt, M. L. Reversible inactivation of pSTS suppresses social  
gaze following in the macaque (*Macaca mulatta*). *Soc. Cogn. Affect. Neurosci.* **9**, 209–17  
690 (2012).
- 692 40. Shepherd, S. V. Following gaze: gaze-following behavior as a window into social  
cognition. *Front. Integr. Neurosci.* **4**, 5 (2010).
- 694 41. Kollock, P. Social Dilemmas: The Anatomy of Cooperation. *Annu. Rev. Sociol.* **24**, 183–  
214 (1998).
- 696 42. Komorita, S. S. & Parks, C. D. Interpersonal Relations: Mixed-Motive Interaction. *Annu.*  
*Rev. Psychol.* **46**, 183–207 (1995).
- 698 43. Platt, M. L., Seyfarth, R. M. & Cheney, D. L. Adaptations for social cognition in the  
primate brain. *Philos. Trans. R. Soc. B Biol. Sci.* **371**, (2016).
- 700 44. Brent, L. J. N. Friends of friends: are indirect connections in social networks important to  
animal behaviour? *Anim. Behav.* **103**, 211–222 (2015).

- 702 45. Silk, J. B. *et al.* The benefits of social capital: Close social bonds among female baboons  
enhance offspring survival. *Proc. R. Soc. B Biol. Sci.* **276**, 3099–104 (2009).
- 704 46. Cheney, D. L. & Seyfarth, R. M. *How monkeys see the world : inside the mind of another  
species.* (University of Chicago Press, 1990).
- 706 47. Cheney, D. L. & Seyfarth, R. M. The representation of social relations by monkeys.  
*Cognition* **37**, 167–196 (1990).
- 708 48. Seyfarth, R. M. & Cheney, D. L. Grooming, alliances and reciprocal altruism in vervet  
monkeys. *Nature* (1984). doi:10.1038/308541a0
- 710 49. van de Waal, E., Borgeaud, C. & Whiten, A. Potent social learning and conformity shape  
a wild primate’s foraging decisions. *Science* **340**, 483–5 (2013).
- 712 50. Cheney, D. L. & Seyfarth, R. M. Recognition of other individuals’ social relationships by  
female baboons. *Anim. Behav.* **58**, 67–75 (1999).
- 714 51. Deaner, R. O., Khera, A. V & Platt, M. L. Monkeys pay per view: adaptive valuation of  
social images by rhesus macaques. *Curr. Biol.* **15**, 543–8 (2005).
- 716 52. Chang, S. W. C., Winecoff, A. A. & Platt, M. L. Vicarious reinforcement in rhesus  
macaques (*macaca mulatta*). *Front. Neurosci.* **5**, 27 (2011).
- 718 53. Carpenter, B. *et al.* Stan : A Probabilistic Programming Language. *J. Stat. Softw.* **76**, 1–32  
(2017).
- 720 54. Akaike, H. in *Second International Symposium on Information Theory* 267–281 (1973).  
doi:10.1007/978-1-4612-1694-0\_15

722

End notes:

724

*Acknowledgements*

726 We thank the DLAR staff at Duke University for providing excellent animal care. This work was  
supported by: R01MH095894, R01MH108627, R37MH109728, and a grant from the Simons  
728 Foundation (SFARI 304935, MLP).

730 *Author contributions*

732 WSO conceived and carried out the experiments, and analyzed the data. SM-K designed the  
behavioral model. WSO and MLP wrote the manuscript with input from SM-K.

734 *Author information*

The authors declare no competing financial interests.

736

738 Figure Legends:

740 Figure 1: “Chicken” game with cooperation option.

742 A) Two players (M1 & M2) sat opposite each other over a shared horizontal screen.

744 B) M1 controlled red annulus (hereafter “car”) with joystick; M2 controlled blue annulus.

746 C) Task sequence.

748 D) Payoff matrix. Red player (M1) occupies row and blue player (M2) occupies column.

750 E) Recording sites in ACCg (orange) and mSTS (green).

752 F) Example outcomes for different actions. Each player could choose straight or yield.

754

Figure 2:

756

A & B) Monkeys understand the task and discriminate agency.

758 Probability of crashing (top) or cooperating (bottom) over time and (B) by payoff  
760 difference for straight ( $V_{\text{straight}}$ ) and cooperate ( $V_{\text{coop}}$ ). (+-SEM).

760

C) Monkeys look at most informative stimuli, calibrated by agency.

762 (i) Top: Probability M1 looked towards opponent’s car synchronized to moving dots

764 onset. SEM calculated between sessions. Bottom: Difference between high and low

764 signal trials. (ii) Same as (i) but for opponent’s face. (iii) Same as (ii) but synchronized  
766 to juice delivery.

766

D) Outcomes for a pair of live opponents across all sessions segregated by payout and signal  
768 strength. Yellow borders indicate Nash equilibria.

770 E) Proportion of trials resulting in Nash outcomes indicated in 2D (+-SEM)

772 Figure 3: Model of player behavior and AIC values for each model.

774 A) Model of events and variables that contribute to player’s internal calculations when  
776 making choices. For details see Methods.

776 B) Model comparisons for live, decoy, and computer conditions. Average log-likelihood  
778 ratio (LLR) change compared to basic model (grey bars) with exclusion of payout  
780 conditions ( $V_t$ ), reward prediction error (Q) and inclusion of intentionality (k1) and  
782 strategic prediction errors (SPE).

780

C) ToM model fits and observed behavior for one player pair.

782 D) Model improvements vary with relative dominance status of players in a dyad.



784 Figure 4: mSTS and ACCg neurons signal abstract, non-perceptual strategic information.

786 A) PSTH for an mSTS neuron during play with live opponent. (i) Response to cooperative,  
788 non-cooperative and 'chicken' rewards. (ii) Responses to high, low and chicken rewards.  
(iii) Responses to high, mid, and low strategy prediction (Pt). (iv) Responses to  
790 cooperative vs non-cooperative rewards with no social gaze.

792 B) PSTH for an ACCg neuron during play with a live opponent. Conventions as in Figure  
4A.

794 C) Percentage of cells in ACCg and mSTS in 3 agency conditions showing significant  
796 modulation by signal strength, reward size, gaze, Pt, and cooperation (0-500ms after car  
movement and 250-1250ms after reward. Also see supplementary table 1.

798 D) Mean absolute model coefficients for all neurons.

800

Figure 5: mSTS neurons selectively encode cooperation.

802

804 A) Normalized mSTS population firing rate (250-1250ms after reward) segregated by  
excitation (top row) and suppression (middle) and all cells (third row). Error bars, +-SEM.

806 B) Normalized population firing rates in ACCg in same period. Conventions as in Figure 5A.

808 Figure 6: Neuronal cooperation signals vary over time.

810 A) PSTHs for mSTS segregated by outcome. Rows show data for neurons enhanced (top),  
suppressed (middle), and all cells (bottom).

812

B) PSTHs for ACCg segregated by outcome. Conventions as in Figure 6A.

814

# Figure 1

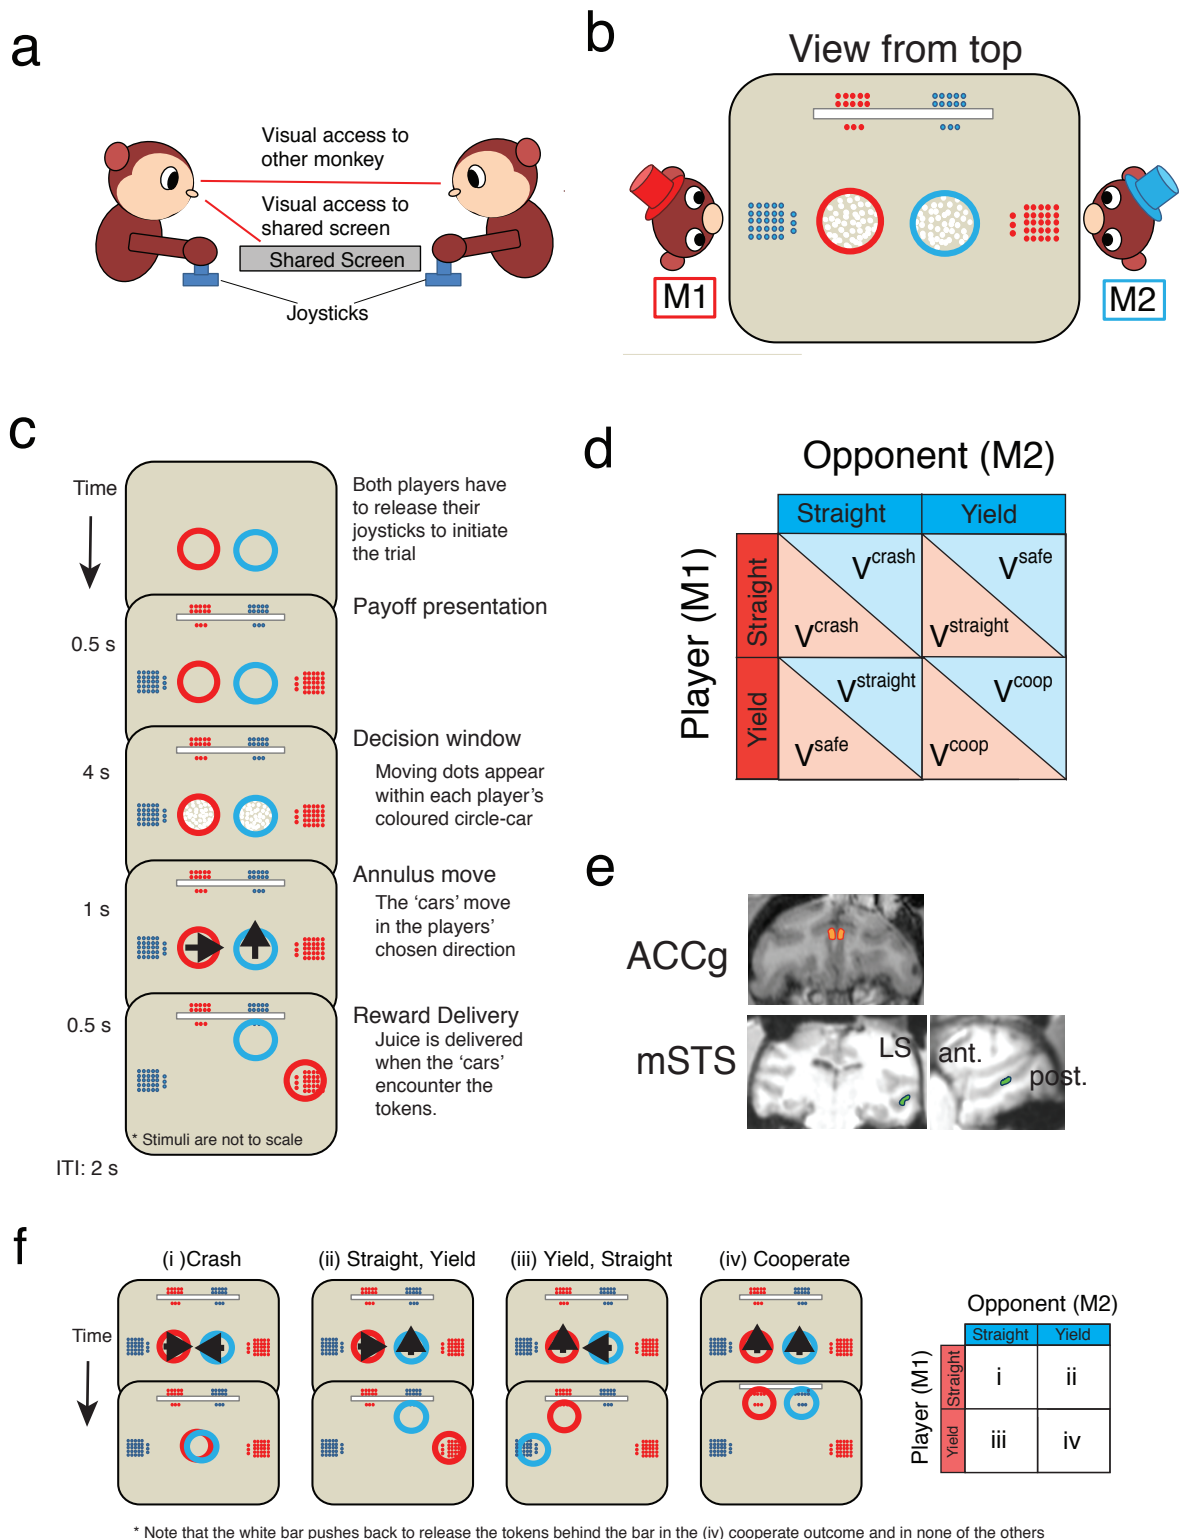

“Chicken” game with cooperation option.

- Two players (M1 & M2) sat opposite each other over a shared horizontal screen.
- M1 controlled red annulus (hereafter “car”) with joystick; M2 controlled blue annulus.
- Task sequence.
- Payoff matrix. Red player (M1) occupies row and blue player (M2) occupies column.
- Recording sites in ACCg (orange) and mSTS (green).
- Example outcomes for different actions. Each player could choose straight or yield.

## Figure 2

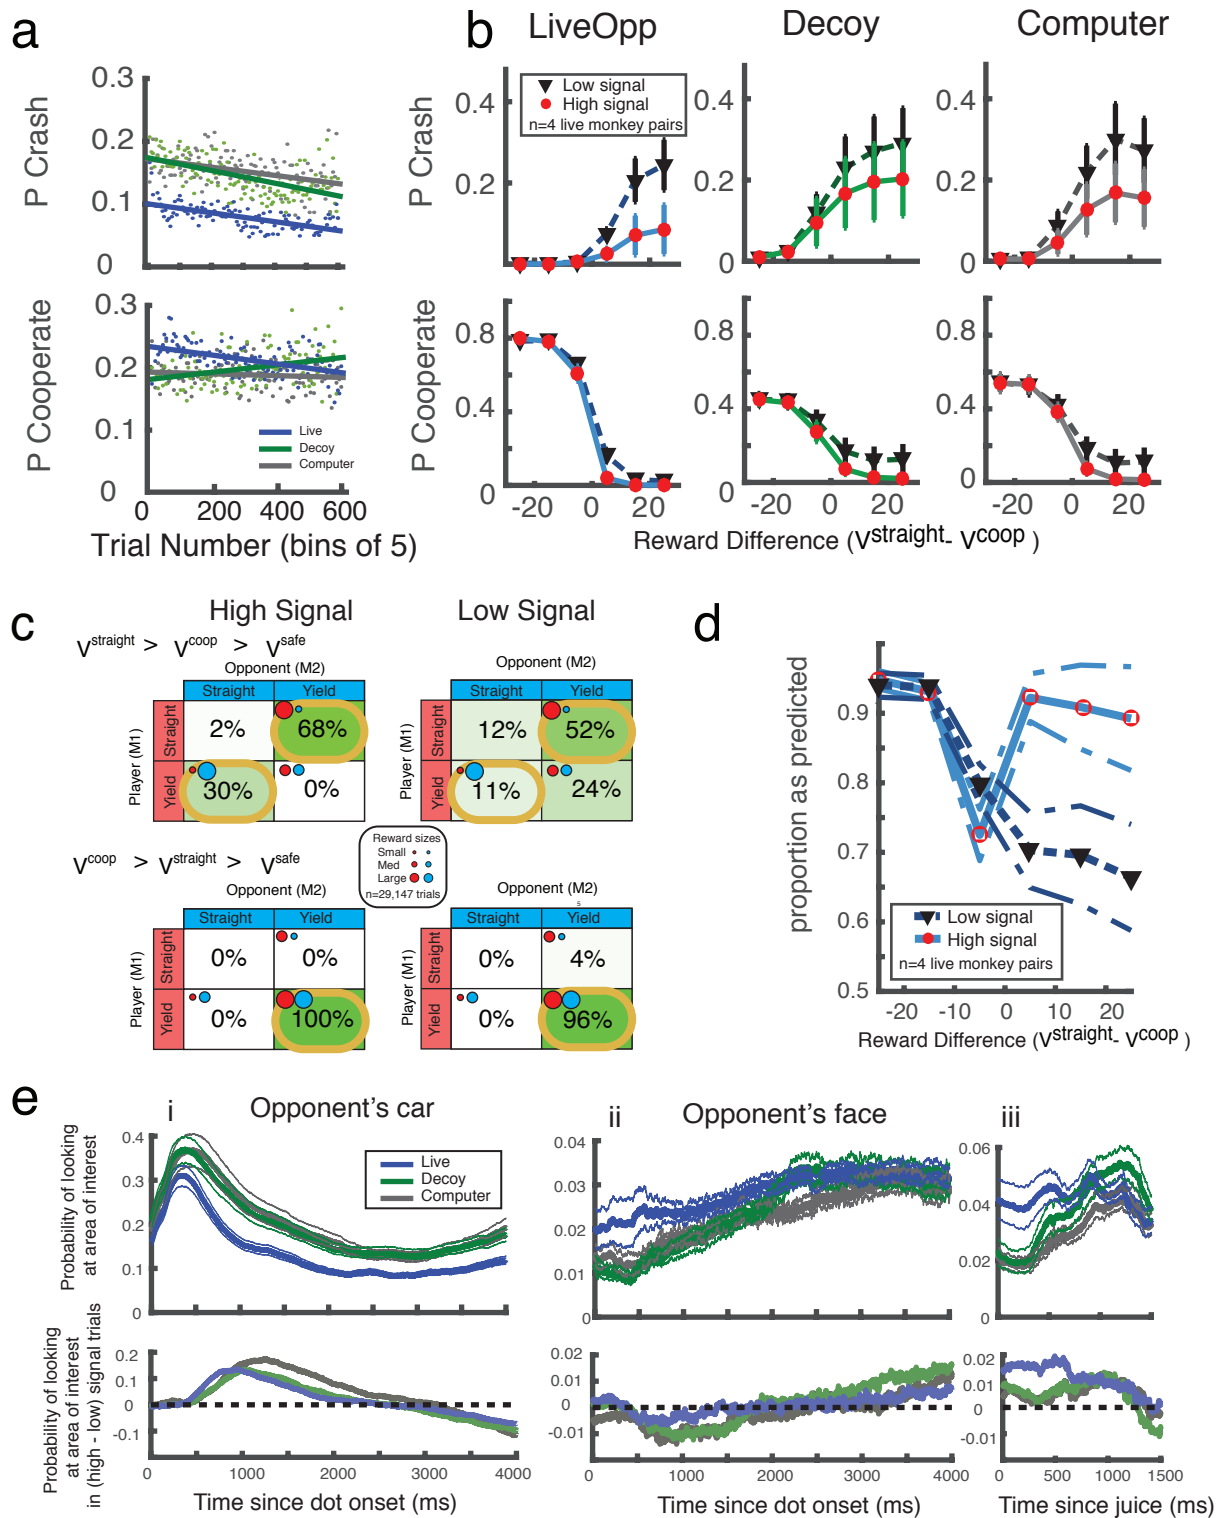

a&b) Monkeys understand the task and discriminate agency.

Probability of crashing (top) or cooperating (bottom) over time and (B) by payoff difference for straight ( $V_{\text{straight}}$ ) and cooperate ( $V_{\text{coop}}$ ). (+-SEM).

c) Monkeys look at most informative stimuli, calibrated by agency.

(i) Top: Probability M1 looked towards opponent's car synchronized to moving dots onset. SEM calculated between sessions. Bottom: Difference between high and low signal trials. (ii) Same as (i) but for opponent's face. (iii) Same as (ii) but synchronized to juice delivery.

d) Outcomes for a pair of live opponents across all sessions segregated by payout and signal strength. Yellow borders indicate Nash equilibria.

e) Proportion of trials resulting in Nash outcomes indicated in 2D (+-SEM)

Example outcomes for different actions. Each player could choose straight or yield.

# Figure 3

a

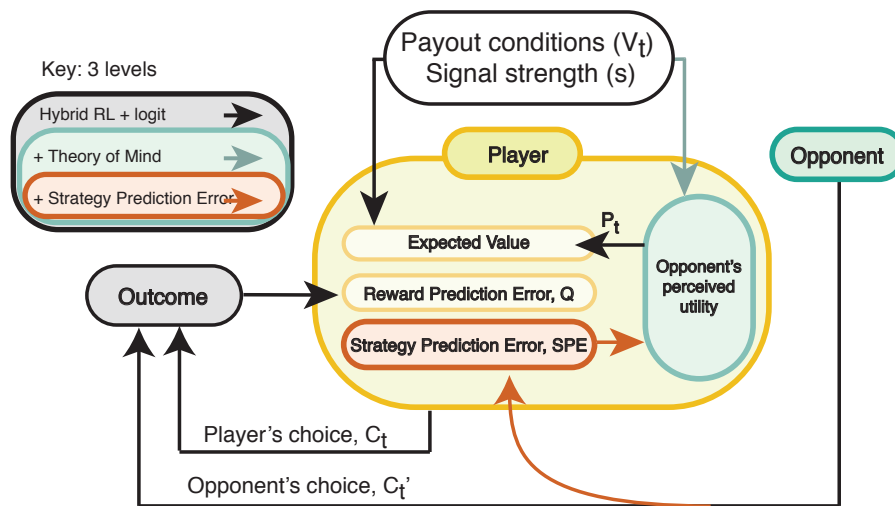

b

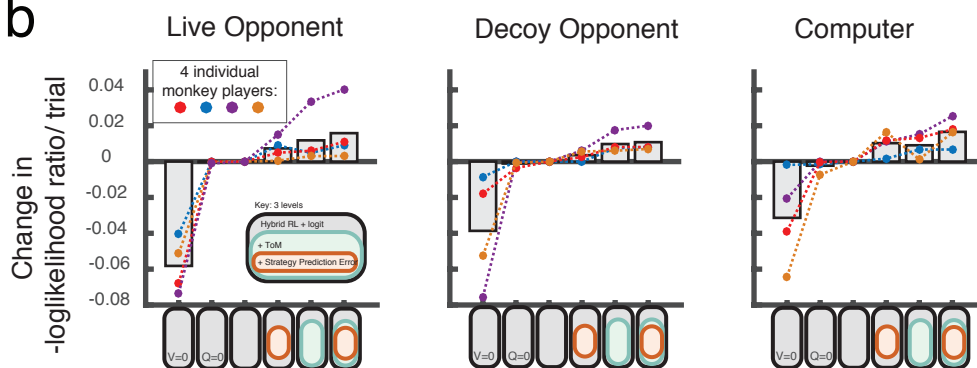

c

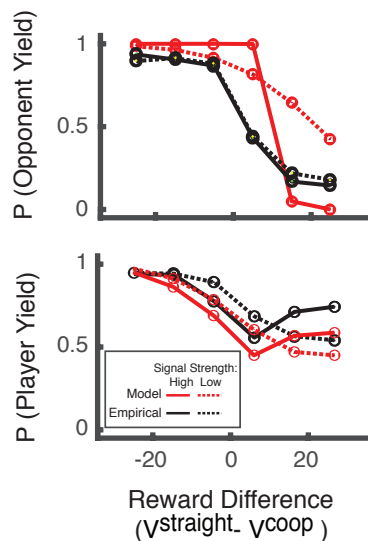

d

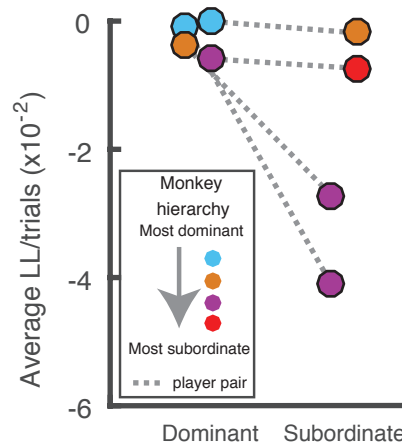

Model of player behavior and AIC values for each model.

- Model of events and variables that contribute to player's internal calculations when making choices. For details see Methods.
- Model comparisons for live, decoy, and computer conditions. Average log-likelihood ratio (LLR) change compared to basic model (grey bars) with exclusion of payout conditions ( $V_t$ ), reward prediction error (Q) and inclusion of intentionality (k1) and strategic prediction errors (SPE).
- ToM model fits and observed behavior for one player pair.
- Model improvements vary with relative dominance status of players in a dyad.

# Figure 4

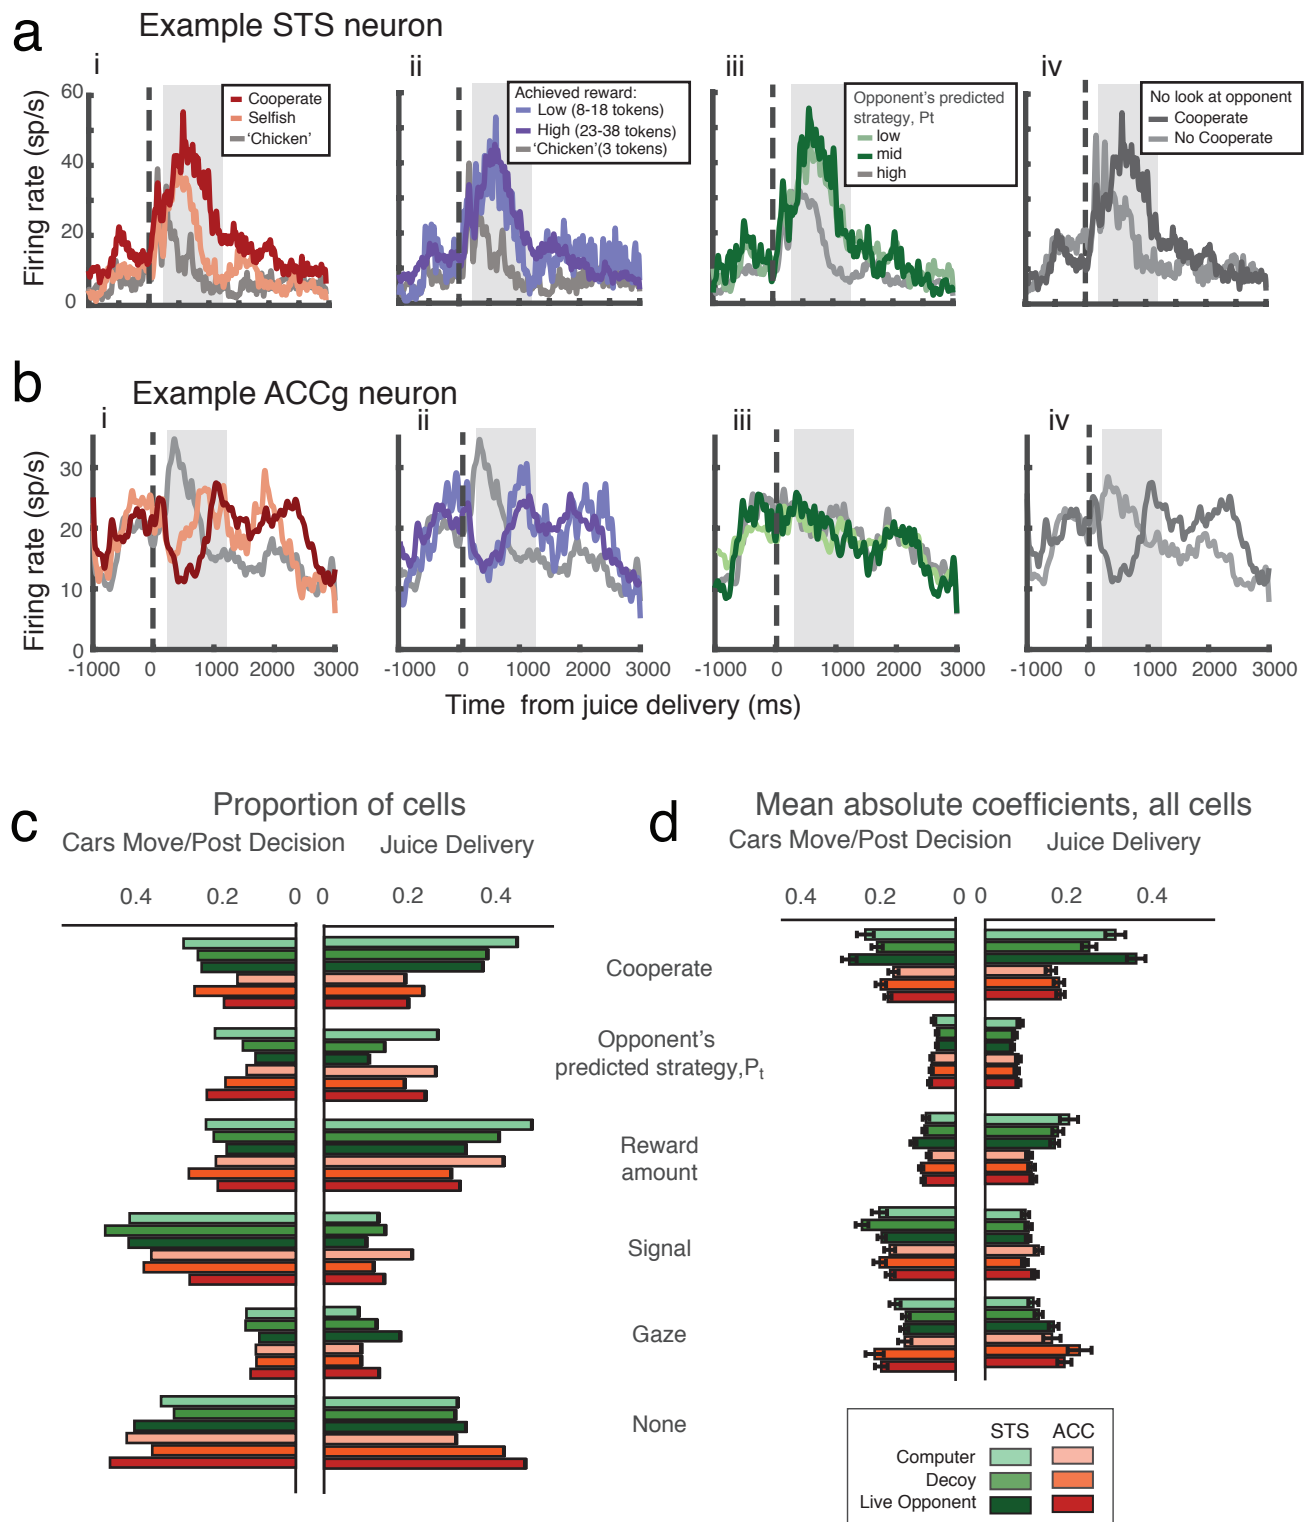

mSTS and ACCg neurons signal abstract, non-perceptual strategic information.

- a) PSTH for an mSTS neuron during play with live opponent. (i) Response to cooperative, non-cooperative and 'chicken' rewards. (ii) Responses to high, low and chicken rewards. (iii) Responses to high, mid, and low strategy prediction ( $P_t$ ). (iv) Responses to cooperative vs non-cooperative rewards with no social gaze.
- b) PSTH for an ACCg neuron during play with a live opponent. Conventions as in Figure 4A.
- c) Percentage of cells in ACCg and mSTS in 3 agency conditions showing significant modulation by signal strength, reward size, gaze,  $P_t$ , and cooperation (0-500ms after car movement and 250-1250ms after reward). Also see supplementary table 1.
- d) Mean absolute model coefficients for all neurons.

# Figure 5

## a. mSTS

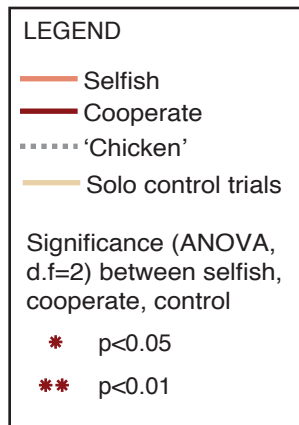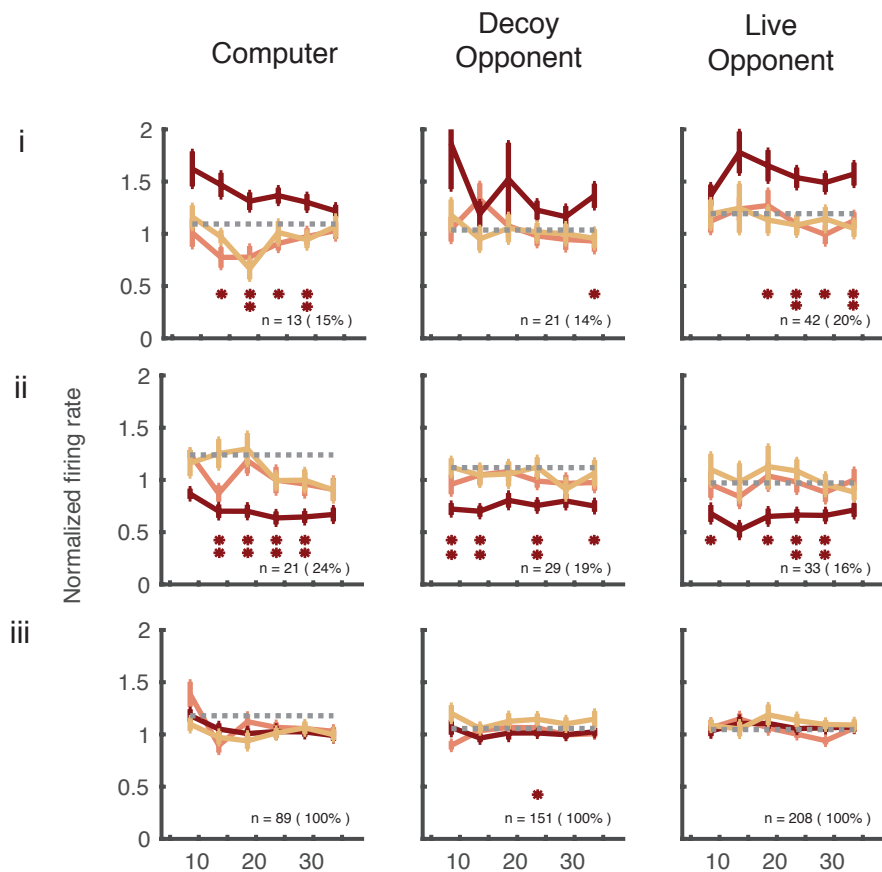

## b. ACCg

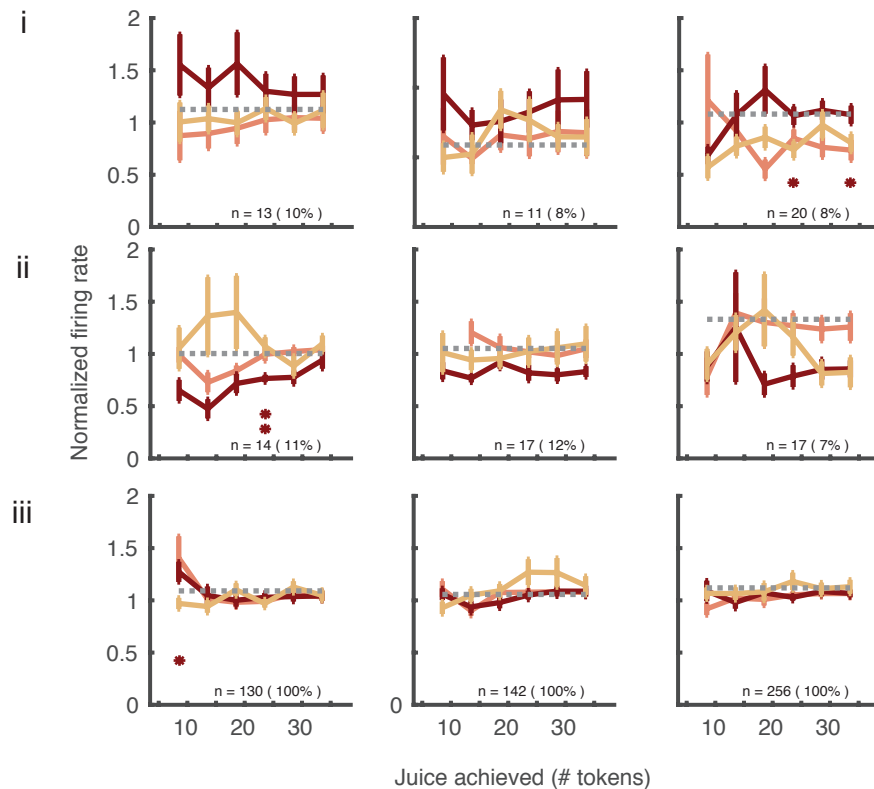

mSTS neurons selectively encode cooperation.

a) Normalized mSTS population firing rate (250-1250ms after reward) segregated by excitation (top row) and suppression (middle) and all cells (third row). Error bars, +SEM.

b) Normalized population firing rates in ACCg in same period. Conventions as in Figure 5a.

# Figure 6

## a. mSTS

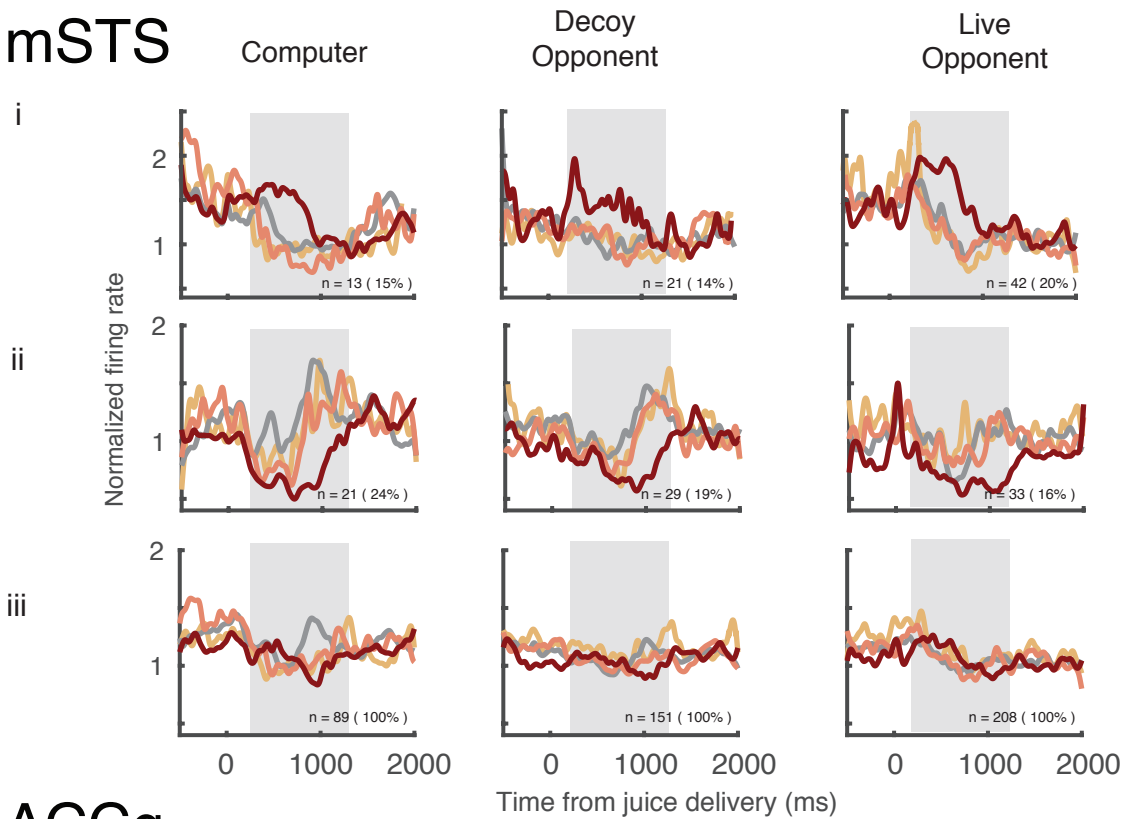

## b. ACCg

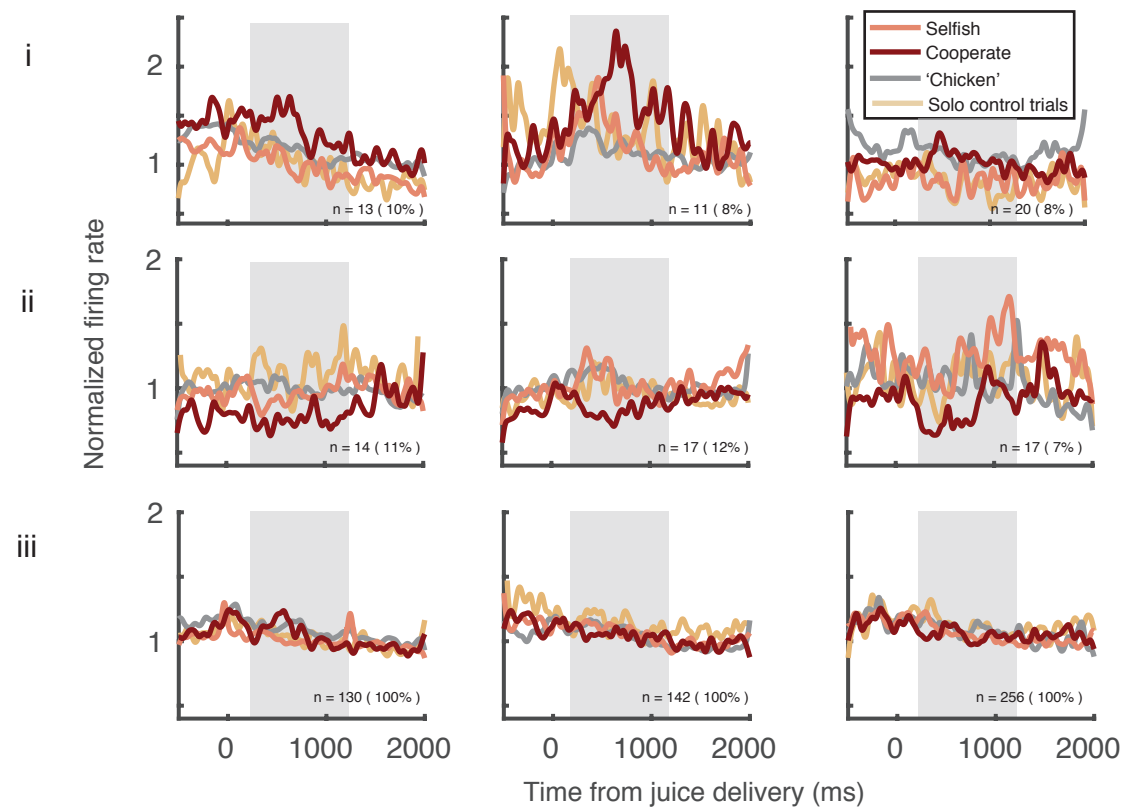

Neuronal cooperation signals vary over time.

a) PSTHs for mSTS segregated by outcome. Rows show data for neurons enhanced (top), suppressed (middle), and all cells (bottom).

b) PSTHs for ACCg segregated by outcome. Conventions as in Figure 6a.
